# Supplementary material
Source: PubMed Central journal article supplement (PMC1544225)
Supplement: pnas_0604883103_6.pdf [file pnas_0604883103_6.pdf]

**Table 3: Properties of RBCs**

| Motif names                                 | Model                                                                              | Function I<br>$f_1 = G_{1st} \times G_{2st}$ | Function II<br>$f_2 = G_{1st} + G_{2st}$    | Susceptibility, $\left(\frac{v_1}{f_2} \frac{\partial f_2}{\partial v_1}\right)^*$<br>* The susceptibility to fluctuations in the production rate of $G_1$ | Constants                                                                                  |
|---------------------------------------------|------------------------------------------------------------------------------------|----------------------------------------------|---------------------------------------------|------------------------------------------------------------------------------------------------------------------------------------------------------------|--------------------------------------------------------------------------------------------|
| <b>Motif I<br/>simple<br/>repression</b>    | 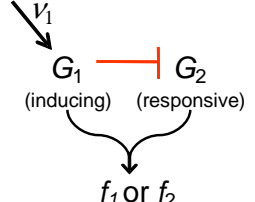  | $v_2 K_{12}$                                 | $v_1 c_1 + \frac{1}{v_1} c_2$               | $\frac{v_1^2}{v_1^2 + c_2} - \frac{c_2}{v_1^2 + c_2}$                                                                                                      | $c_1 = 1$<br>$c_2 = v_2 K_{12}$                                                            |
| <b>Motif II<br/>dampened<br/>controller</b> |   | $v_2 K_{12}$                                 | $\sqrt{v_1} c_1 + \frac{1}{\sqrt{v_1}} c_2$ | $\frac{1}{2} \left( \frac{v_1}{v_1 + c_2^*} - \frac{c_2^*}{v_1 + c_2^*} \right)$                                                                           | $c_1 = \sqrt{K_{11}}, c_2 = v_2 K_{12}$<br>$c_2^* = \frac{c_2}{c_1}$                       |
| <b>Motif III<br/>cycled<br/>feedback</b>    |  | $v_2 K_{12}$                                 | $\sqrt{v_1} c_1 + \frac{1}{\sqrt{v_1}} c_2$ | $\frac{v_1}{v_1 + K} - \frac{K}{v_1 + K}$<br>* Simplifications:<br>1) $K_{12} = K_{21} = K$<br>2) $G_1, G_2 \gg K$                                         | $c_1 = \sqrt{v_2} \sqrt{\frac{K_{12}}{K_{21}}}$<br>$c_2 = \sqrt{v_2} \sqrt{K_{12} K_{21}}$ |

All formulas in the table were calculated based on the simplifying assumption:  $K_{12} \ll G_1$ . For detailed calculation of solutions, with and without this simplification, see supporting text.

\*Analysis was exclusively limited to the three RBC circuitries that fulfill both criteria of (i) maintaining negative feedback and (ii) can be modeled with no more than two free variables.

|         |                    |                                 |                                                                                                  |
|---------|--------------------|---------------------------------|--------------------------------------------------------------------------------------------------|
| $G_1$   | Controller gene.   | $\alpha$                        | Degradation rate                                                                                 |
| $G_2$   | Responsive gene    | $K_{IL}$                        | Thermodynamic dissociation constant between protein 'I' and its cis-regulatory motif on gene 'L' |
| $\beta$ | Transcription rate | $v \equiv \frac{\beta}{\alpha}$ | maximal steady state concentration                                                               |

One observation that is immediately apparent from examination of the results in table 3 is that the product of the concentrations of the two redundant proteins is insensitive to variations of the controller,  $G_1$  ( $G_1 \times G_2$  does not depend on  $v_1$ , the maximal production rate of  $G_1$ ). One important aspect of this result is its generality as it extends beyond the scope of RBCs and may hold true for complexes or heterodimers given that one monomer with these complexes negatively regulates the rest [as may be the case for some heterodimers (see HN-S/StpA, table 1)]. An interesting question stemming from this result is what are the functional advantages that are associated with this property? One attractive possibility is that this regulatory design masks the function from dosage fluctuations of the controller. In contrast to this circuits' intolerance to  $G_1$ 's deletion, it is highly robust to variations in  $G_1$ 's dosage (as long as it is kept above zero).
