# Supplementary material
Source: PubMed Central journal article supplement (PMC1544225)

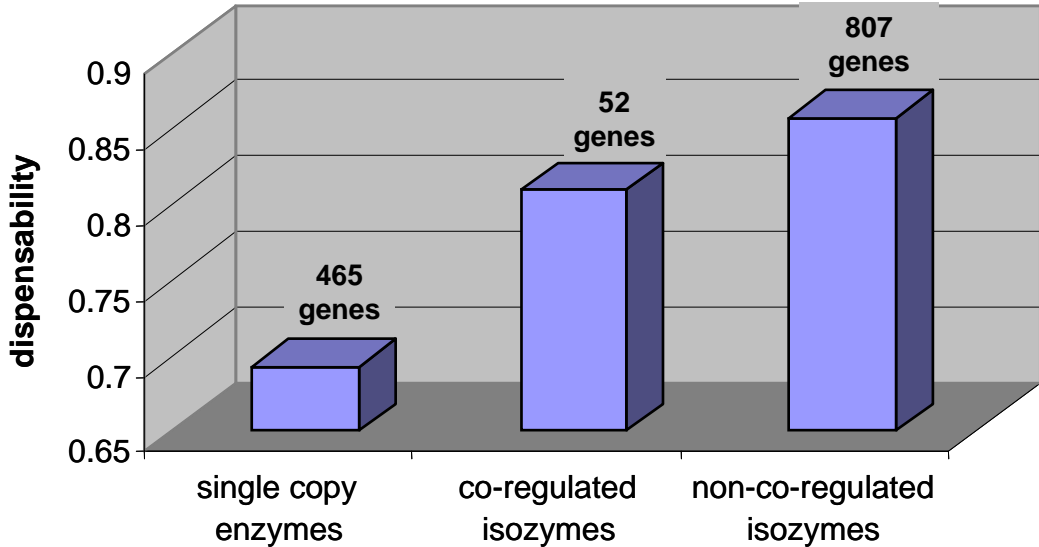

Supplement: pnas_0604883103_1.pdf [file pnas_0604883103_1.pdf]

**A**

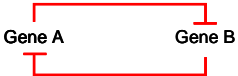

**C**

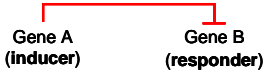

**B**

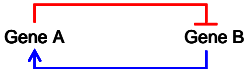

Supplement: pnas_0604883103_3.pdf [file pnas_0604883103_3.pdf]

**A**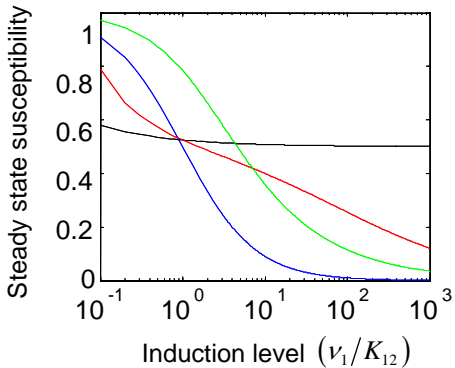**B**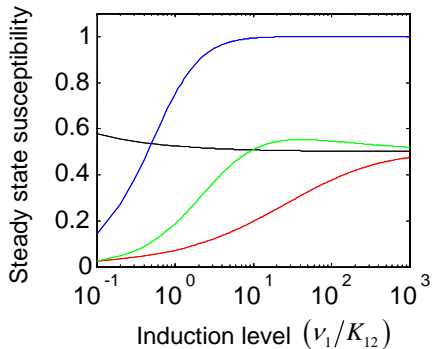

Supplement: pnas_0604883103_5.pdf [file pnas_0604883103_5.pdf]
